# Supplementary material
Source: PubMed Central journal article supplement (PMC7390435)
Supplement: NIHMS1603697-supplement-1.pdf [file NIHMS1603697-supplement-1.pdf]

**Supplementary Table 1: Metabolites found at significantly different levels in children who became obese by age 3-5**

| <b>Major Metabolic Pathway</b> | <b>Metabolite</b>                          | <b>Odds Ratio</b> | <b>p-value</b> |
|--------------------------------|--------------------------------------------|-------------------|----------------|
| <b>Amino acid</b>              | glycine                                    | 1.56              | 0.0668         |
|                                | serine                                     | 1.42              | 0.0884         |
|                                | beta-alanine                               | 1.42              | 0.0739         |
|                                | glutamate                                  | 1.82              | 0.0487         |
|                                | N-acetyltyrosine                           | 0.74              | 0.0735         |
|                                | kynurenate                                 | 0.73              | 0.0292         |
|                                | tryptophan                                 | 0.92              | 0.0584         |
|                                | indolepropionate                           | 0.5               | 0.0169         |
|                                | cysteine                                   | 1.24              | 0.0605         |
|                                | S-methylcysteine                           | 1.26              | 0.0787         |
|                                | cystine                                    | 1.49              | 0.0112         |
|                                | N-acetylmethionine                         | 0.87              | 0.074          |
|                                | 2-hydroxybutyrate (AHB)                    | 0.76              | 0.0518         |
|                                | ornithine                                  | 1.71              | 0.0573         |
|                                | 2-aminobutyrate                            | 0.83              | 0.0576         |
| <b>Peptide</b>                 | pro-hydroxy-pro                            | 0.89              | 0.0596         |
|                                | gamma-glutamylvaline                       | 0.88              | 0.0514         |
| <b>Carbohydrate</b>            | mannitol                                   | 0.4               | 0.0617         |
|                                | 3-phosphoglycerate                         | 1.43              | 0.041          |
|                                | arabinose                                  | 1.12              | 0.0869         |
| <b>Energy</b>                  | citrate                                    | 1.15              | 0.0893         |
| <b>Lipid</b>                   | linoleate (18:2n6)                         | 1.39              | 0.0491         |
|                                | linolenate [alpha or gamma; (18:3n3 or 6)] | 1.47              | 0.0602         |
|                                | pelargonate (9:0)                          | 0.83              | 0.0474         |
|                                | caprate (10:0)                             | 1.33              | 0.0205         |
|                                | laurate (12:0)                             | 1.64              | 0.0064         |
|                                | myristate (14:0)                           | 1.32              | 0.0508         |
|                                | palmitate (16:0)                           | 1.22              | 0.0315         |
|                                | 10-heptadecenoate (17:1n7)                 | 1.56              | 0.0634         |
|                                | stearate (18:0)                            | 1.16              | 0.0454         |
|                                | oleate (18:1n9)                            | 1.53              | 0.0428         |

|                               |                                                |        |        |
|-------------------------------|------------------------------------------------|--------|--------|
|                               | 10-nonadecenoate (19:1n9)                      | 1.57   | 0.0686 |
|                               | eicosenoate (20:1n9 or 11)                     | 1.51   | 0.0682 |
|                               | 3-hydroxydecanoate                             | 1.31   | 0.0677 |
|                               | 2-hydroxypalmitate                             | 1.14   | 0.0228 |
|                               | 2-aminooctanoate                               | 0.83   | 0.0905 |
|                               | Carnitine                                      | 1.11   | 0.087  |
|                               | Acetylcarnitine                                | 1.2    | 0.0737 |
|                               | hexanoylcarnitine                              | 1.24   | 0.0559 |
|                               | octanoylcarnitine                              | 1.35   | 0.0568 |
|                               | decanoylcarnitine                              | 1.31   | 0.0295 |
|                               | Laurylcarnitine                                | 1.45   | 0.0454 |
|                               | Oleoylcarnitine                                | 1.4    | 0.0149 |
|                               | glycochenodeoxycholate                         | 1.49   | 0.0217 |
|                               | Ethanolamine                                   | 2.1    | 0.0216 |
|                               | phosphoethanolamine                            | 1.47   | 0.0448 |
|                               | 2-oleoylglycerophosphoethanolamine*            | 1.36   | 0.0463 |
|                               | 5alpha-pregnan-3alpha,20beta-diol disulfate 1* | 1.43   | 0.0624 |
|                               | pregnenolone sulfate                           | 0.83   | 0.0877 |
| <b>Cofactors and vitamins</b> | Threonate                                      | 0.88   | 0.0434 |
|                               | Pantothenate                                   | 0.58   | 0.0534 |
|                               | pyridoxate                                     | 0.59   | 0.0064 |
|                               | gamma-tocopherol                               | 1.47   | 0.0354 |
| <b>Xenobiotics</b>            | catechol sulfate                               | 0.56   | 0.0248 |
|                               | benzoate                                       | 0.85   | 0.024  |
|                               | glycolate (hydroxyacetate)                     | 0.88   | 0.0927 |
|                               | glycerol 2-phosphate                           | 1.63   | 0.087  |
|                               | 2-piperidinone                                 | 1.38   | 0.0553 |
|                               | 4-acetaminophen sulfate                        | 2.26   | 0.0441 |
|                               | 4-acetamidophenol                              | 2.95   | 0.02   |
|                               | 2-hydroxyacetaminophen sulfate*                | 3.47   | 0.0152 |
|                               | 2-methoxyacetaminophen sulfate*                | 3.49   | 0.0357 |
|                               | 3-(cystein-S-yl)acetaminophen*                 | 2.11   | 0.0721 |
|                               | 2-methoxyacetaminophen glucuronide*            | 2.7    | 0.0472 |
|                               | 3-(N-acetyl-L-cystein-S-yl) acetaminophen*     | 2.15   | 0.0243 |
| cinnamoylglycine              | 0.56                                           | 0.0012 |        |

|                                                  |                   |      |        |
|--------------------------------------------------|-------------------|------|--------|
|                                                  | 3,7-dimethylurate | 0.31 | 0.0247 |
|                                                  | 3-methylxanthine  | 0.42 | 0.0489 |
| **These values are not adjusted for confounding. |                   |      |        |
